# Supplementary material for: Identification of a Key Enzyme for the Hydrolysis of β-(1→3)-Xylosyl Linkage in Red Alga Dulse Xylooligosaccharide from Bifidobacterium Adolescentis
Source: MDPI journal article supplement (doi:10.3390/md18030174), 2020-03-20
Supplement: s1 [file s1]

**Table S1.** Effect of saccharide on bacterial growth and pH

| Bacteria                                             | JCM  |                   | G1 <sup>*</sup> | X1 <sup>*</sup> | X3 <sup>*</sup>    | DX3 <sup>*</sup> |
|------------------------------------------------------|------|-------------------|-----------------|-----------------|--------------------|------------------|
| <i>Bacteroides thetaiotaomicron</i>                  | 5827 | OD <sub>600</sub> | 0.93±0.01       | 1.01±0.02       | 0.33±0.02          | 0.24±0.01        |
|                                                      |      | pH                | -0.80±0.15      | -1.07±0.21      | -0.13±0.08         | -0.26±0.05       |
| <i>Bacteroides vulgatus</i>                          | 5826 | OD <sub>600</sub> | 0.17±0.01       | 0.40±0.01       | 0.43±0.03          | 0.36±0.03        |
|                                                      |      | pH                | -1.13±0.04      | -1.35±0.12      | -1.25±0.03         | -1.04±0.02       |
| <i>Bifidobacterium adolescentis</i>                  | 7046 | OD <sub>600</sub> | 1.46±0.00       | 1.10±0.00       | 1.34±0.02          | 1.39±0.01        |
|                                                      |      | pH                | -2.34±0.10      | -2.29±0.08      | -2.23±0.06         | -2.37±0.08       |
| <i>Bifidobacterium longum</i> subsp. <i>infantis</i> | 1222 | OD <sub>600</sub> | 1.28±0.04       | 0.00±0.00       | -0.01±0.01         | 0.02±0.02        |
|                                                      |      | pH                | -2.15±0.04      | -0.02±0.05      | 0.06±0.04          | 0.03±0.07        |
| <i>Bifidobacterium longum</i> subsp. <i>longum</i>   | 1217 | OD <sub>600</sub> | 1.59±0.01       | 1.01±0.01       | -0.01±0.00         | 0.00±0.00        |
|                                                      |      | pH                | -2.39±0.05      | -2.37±0.17      | 0.17±0.07          | 0.17±0.15        |
| <i>Clostridium paraputrificum</i>                    | 1293 | OD <sub>600</sub> | 1.55±0.03       | 0.02±0.03       | N.D. <sup>**</sup> | 0.03±0.03        |
|                                                      |      | pH                | -1.49±0.07      | 0.07±0.07       | N.D. <sup>**</sup> | -0.01±0.04       |
| <i>Eubacterium limosum</i>                           | 6421 | OD <sub>600</sub> | 1.40±0.00       | -0.03±0.01      | N.D. <sup>**</sup> | 0.02±0.00        |
|                                                      |      | pH                | -1.43±0.01      | -0.04±0.21      | N.D. <sup>**</sup> | 0.04±0.10        |
| <i>Lactobacillus acidophilus</i>                     | 1132 | OD <sub>600</sub> | 0.88±0.03       | -0.00±0.00      | -0.01±0.01         | 0.01±0.00        |
|                                                      |      | pH                | -2.34±0.06      | -0.08±0.14      | 0.01±0.07          | 0.03±0.11        |
| <i>Lactobacillus casei</i>                           | 1134 | OD <sub>600</sub> | 0.77±0.01       | 0.01±0.01       | 0.00±0.00          | 0.02±0.01        |
|                                                      |      | pH                | -2.59±0.07      | 0.02±0.12       | 0.06±0.15          | 0.09±0.06        |
| <i>Lactobacillus salivarius</i>                      | 1040 | OD <sub>600</sub> | 1.19±0.02       | -0.02±0.01      | 0.03±0.02          | 0.05±0.02        |
|                                                      |      | pH                | -2.55±0.06      | -0.08±0.02      | 0.18±0.02          | 0.10±0.06        |

The OD<sub>600</sub> and pH were monitored after incubation in PYF medium with or without sugar at 37 °C for 96 h.

\* The data were obtained by the subtraction of each bacterial growth without sugar.

\*\* N.D., Not determined.
