# Supplementary material for: Identification of a Key Enzyme for the Hydrolysis of β-(1→3)-Xylosyl Linkage in Red Alga Dulse Xylooligosaccharide from Bifidobacterium Adolescentis
Source: MDPI journal article supplement (doi:10.3390/md18030174), 2020-03-20
Supplement: s1 [file s1]

**Table S2.** Primers used in this study

| Primer         | Sequence                                      | Target genes | GH      |
|----------------|-----------------------------------------------|--------------|---------|
| BAD0423GH43_12 | 5'- <u>CATATG</u> ACCACAACGATTACCATCGCC-3'    | BAD0423      | GH43_12 |
| BAD0423GH43_12 | 5'- <u>GGATCC</u> CTATGCCATGAAGCCGGCCATG-3'   |              |         |
| BaGH43Fw       | 5'- <u>CATATG</u> AAGATTTCCAACCCGGTGCTCACC-3' | BAD0428      | GH43_11 |
| BaGH43Re       | 5'- <u>AAGCTT</u> CTACCGGTTGTCGGGAAGCTCCC-3'  |              |         |
| GH43_BAD1527F  | 5'- <u>CATATG</u> AGCATCGACACCCAGGCCTATC-3'   | BAD1527      | GH43_22 |
| GH43_BAD1527R  | 5'- <u>AAGCTT</u> CTACAGGGCGAAGGCGGTTTCG-3'   |              |         |
| GH43_BAD1203F  | 5'- <u>CATATG</u> CTGCATAATCCGATCTTCAAAGGC-3' | BAD1203      | GH43_11 |
| GH43_BAD1203R  | 5'- <u>AAGCTT</u> TCAGTCGACGGGCTTCGTCTCG-3'   |              |         |

Underline shows restriction enzyme site.
