# Supplementary figures and images for: Identification of a Key Enzyme for the Hydrolysis of β-(1→3)-Xylosyl Linkage in Red Alga Dulse Xylooligosaccharide from Bifidobacterium Adolescentis
Source: MDPI journal article supplement (doi:10.3390/md18030174), 2020-03-20

Supplementary materials: Figure S1

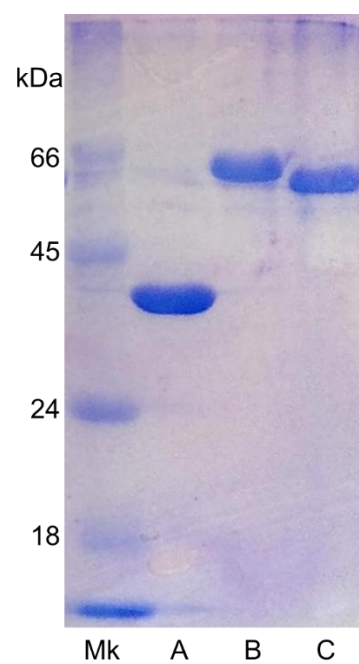

**Figure S1.** SDS-PAGE. (A), BAD1527; (B), BAD0423; and (C) BAD0428.

Supplement: s1 [file s1]
